# Supplementary material for: A positive feed-forward loop between LncRNA-URRCC and EGFL7/P-AKT/FOXO3 signaling promotes proliferation and metastasis of clear cell renal cell carcinoma
Source: PubMed Central journal article supplement (PMC6449923; doi:10.1186/s12943-019-0998-y), 2019-04-05

FigS2.

A

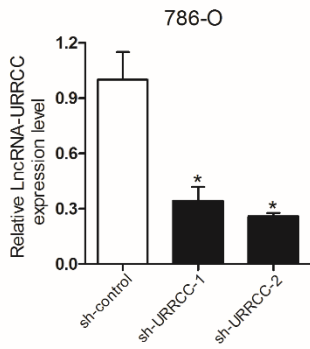

B

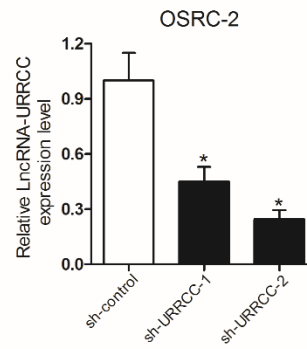

C

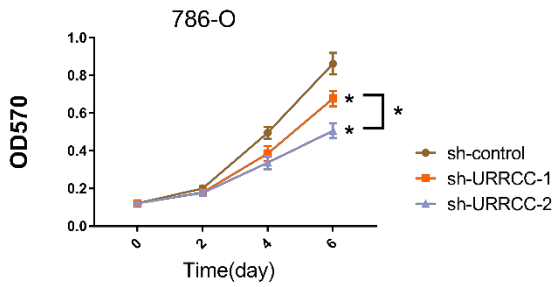

D

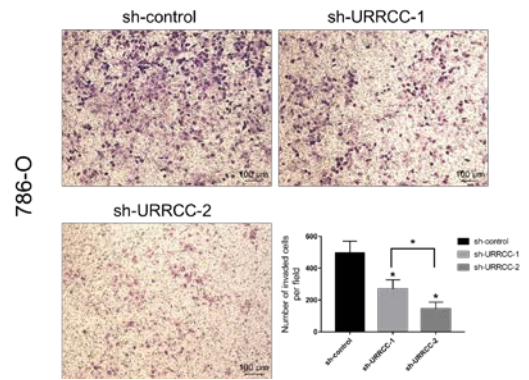

Supplement: 12943_2019_998_MOESM7_ESM.pdf [file 12943_2019_998_MOESM7_ESM.pdf]
