# Supplementary material for: A positive feed-forward loop between LncRNA-URRCC and EGFL7/P-AKT/FOXO3 signaling promotes proliferation and metastasis of clear cell renal cell carcinoma
Source: Mol Cancer. 2019 Apr 5;18:81. doi: 10.1186/s12943-019-0998-y (PMC6449923; doi:10.1186/s12943-019-0998-y)
Supplement: Supplementary file 1 — Table S1. Primers used for real-time PCR, vector construction, and ChIP. (XLSX 11 kb) [file 12943_2019_998_MOESM1_ESM.xlsx]

## Sheet: Sheet1
Table S1
Primers used for real-time PCR, vector construction, and ChIP.
Primer names		Sequences
1	URRCC Forward	5'GCATCATCTTCACTTGCTTCAT3'	AACTCAACGAAGGCGAAGG	AACTCAACGAAGGCGAAGG	AACTCAACGAAGGCGAAGG	AACTCAACGAAGGCGAAGG
	URRCC Reverse	5'TCTGGGCTGGAATAACCTTG3'	AACTCAACGAAGGCGAAGG	AACTCAACGAAGGCGAAGG	AACTCAACGAAGGCGAAGG	AACTCAACGAAGGCGAAGG
2	AK055783 Forward	5'ATTCACCCACCTACCTGTCG3'
	AK055783 Reverse	5'CCACGTCTCTGCACCTTGTA3'
3	AK026225 Forward	5'AACATCCTGTGCATTGGTGA3'
	AK026225 Reverse	5'GGAGGAGGCAGTCTACATGG3'
4	EGFL7 Forward	5'TCGTGCAGCGTGTGTACCAG3'	AACTCAACGAAGGCGAAGG	AACTCAACGAAGGCGAAGG	AACTCAACGAAGGCGAAGG	AACTCAACGAAGGCGAAGG
	EGFL7 Reverse	5'GCGGTAGGCGGTCCTATAGATG3'	AACTCAACGAAGGCGAAGG	AACTCAACGAAGGCGAAGG	AACTCAACGAAGGCGAAGG	AACTCAACGAAGGCGAAGG
5	FOXO3 Forward	5'GCAAACCTGCCCGTCAT3'
	FOXO3 Reverse	5'TCAAAGTTAAAATCCAACCCAT3'
6	β-Actin Forward	5'GGGACCTGACTGACTACCTC3'
	β-Actin Reverse	5'TCATACTCCTGCTTGCTGAT3'
7	U6 Forward	5'CTCGCTTCGGCAGCACA3'
	U6 Reverse	5'AACGCTTCACGAATTTGCGT3'
	U6 RT primer	5'AACGCTTCACGAATTTGCGT3'
8	oe-URRCC Forward	5'GTACCTGATTCGCCTGCCAGAACACCTCAGCCTC3'
	oe-URRCC Reverse	5'TTTATATGTTTAAATTTTAATACTCAAGAAAACAAACC3'
9	Histone H3 Primer (for ChIP)-Forward	5'ACGGTCATGATGCCCACTG3'
	Histone H3 Primer (for ChIP)-Reverse	5'CGGGCCCTTTGCTAGCTTTC3'
10	Histone H4 Primer (for ChIP)-Forward	5'GTCCCGGGGTGGTTTTCAG3'
	Histone H4 Primer (for ChIP)-Reverse	5'GGGGACGCACGACCAAG3'
11	ChIP-FOXO3-Forward	5'GTCAATTTGTAGTGAGGCTGTTGG3'
	ChIP-FOXO3-Reverse	5'AATCCTTGAAGAGTATCCCAGCC3'
