# Supplementary material for: A positive feed-forward loop between LncRNA-URRCC and EGFL7/P-AKT/FOXO3 signaling promotes proliferation and metastasis of clear cell renal cell carcinoma
Source: Mol Cancer. 2019 Apr 5;18:81. doi: 10.1186/s12943-019-0998-y (PMC6449923; doi:10.1186/s12943-019-0998-y)
Supplement: Supplementary file 4 — Table S3. BX649059 expression in ccRCC and normal renal samples from TCGA KIRC dataset. (XLS 27 kb) [file 12943_2019_998_MOESM4_ESM.xls]

Table S3 . BX649059 expression in ccRCC and normal renal samples from TCGA KIRC dataset
ID	TCGA-CW-5580-11A-02R-1672-07	TCGA-CW-5591-11A-01R-1541-07	TCGA-CZ-5467-11A-01R-1503-07	TCGA-B0-5703-11A-01R-1541-07	TCGA-CW-5585-11A-01R-1541-07	TCGA-CZ-5454-11A-01R-1503-07	TCGA-CW-6087-11A-01R-1672-07	TCGA-B0-5696-11A-01R-1541-07	TCGA-CZ-5457-11A-01R-1503-07	TCGA-CZ-5466-11A-01R-1503-07	TCGA-B0-5706-11A-01R-1541-07	TCGA-CZ-5468-11A-01R-1503-07	TCGA-CZ-5455-11A-01R-1503-07	TCGA-CW-5584-11A-01R-1541-07	TCGA-CZ-5988-11A-01R-1672-07	TCGA-CZ-5461-11A-01R-1503-07	TCGA-CZ-5986-11A-01R-1672-07	TCGA-CJ-5672-11A-01R-1541-07	TCGA-B0-5690-11A-01R-1541-07	TCGA-B0-5699-11A-01R-1541-07	TCGA-CZ-5984-11A-01R-1672-07	TCGA-CZ-4863-11A-01R-1503-07	TCGA-CJ-6030-11A-01R-1672-07	TCGA-B0-5697-11A-01R-1541-07	TCGA-B8-5549-11A-01R-1541-07	TCGA-CW-5581-11A-01R-1541-07	TCGA-B0-5694-11A-01R-1541-07	TCGA-CZ-5465-11A-01R-1503-07	TCGA-CW-6088-11A-01R-1672-07	TCGA-CZ-5453-11A-01R-1503-07	TCGA-CJ-5678-11A-01R-1541-07	TCGA-CJ-5676-11A-01R-1541-07	TCGA-B2-5636-11A-01R-1541-07	TCGA-CJ-5679-11A-01R-1541-07	TCGA-B0-5711-11A-01R-1672-07	TCGA-CW-6090-11A-01R-1672-07	TCGA-B0-5402-11A-01R-1503-07	TCGA-CZ-5452-11A-01R-1503-07	TCGA-CZ-4865-11A-01R-1503-07	TCGA-CZ-5451-11A-01R-1503-07	TCGA-CJ-5677-11A-01R-1541-07	TCGA-CJ-5689-11A-01R-1541-07	TCGA-B8-4622-11A-01R-1758-07	TCGA-B8-5552-11A-01R-1672-07	TCGA-CZ-5470-11A-01R-1503-07	TCGA-CW-5589-11A-01R-1541-07	TCGA-B0-5709-11A-01R-1541-07	TCGA-CZ-5987-11A-01R-1672-07	TCGA-B0-4712-11A-02R-1503-07
expression	0.2801712	6.644884	0.2221313	0.3775885	0.7900053	0.1752461	0.4924927	0.6506977	0.1726096	0.9591488	0.1946013	0.1629272	0.2310531	1.504335	0.5386551	0.3624375	0.403884	0.2088503	0.3610147	0.4027436	0.7405399	0.6485202	0.8228819	0.4146787	0.1438639	0.5840712	1.281608	0.279591	0.2178436	0.8477421	0.7459745	1.415054	0.7895528	1.220502	0.4498917	1.239656	0.6048368	0.1692495	0.3463628	0.6805773	0.7696846	0.5536061	1.256011	2.154362	0.3611321	0.623155	0.9529683	0.9628546	0.1913448
Type	Normal	Normal	Normal	Normal	Normal	Normal	Normal	Normal	Normal	Normal	Normal	Normal	Normal	Normal	Normal	Normal	Normal	Normal	Normal	Normal	Normal	Normal	Normal	Normal	Normal	Normal	Normal	Normal	Normal	Normal	Normal	Normal	Normal	Normal	Normal	Normal	Normal	Normal	Normal	Normal	Normal	Normal	Normal	Normal	Normal	Normal	Normal	Normal	Normal
[truncated: 562 more columns]
