# Supplementary material for: A positive feed-forward loop between LncRNA-URRCC and EGFL7/P-AKT/FOXO3 signaling promotes proliferation and metastasis of clear cell renal cell carcinoma
Source: Mol Cancer. 2019 Apr 5;18:81. doi: 10.1186/s12943-019-0998-y (PMC6449923; doi:10.1186/s12943-019-0998-y)
Supplement: Supplementary file 14 — Table S10. FOXO3 expression and paitients' survival time from TCGA KIRC dataset. (XLS 19 kb) [file 12943_2019_998_MOESM14_ESM.xls]

Table S10. FOXO3 expression and paitients�� survival time from TCGA KIRC dataset
id	futime	fustat	FOXO3
TCGA-T7-A92I	0.975342466	0	11.20529
TCGA-GK-A6C7	0.167123288	0	11.32872
TCGA-BP-4349	1.019178082	0	11.42553
TCGA-B0-4693	0.210958904	1	8.675994
TCGA-BP-5177	0.802739726	0	7.204416
TCGA-DV-A4VX	4.454794521	1	10.46656
TCGA-CJ-4893	2.054794521	0	6.959455
TCGA-BP-4174	5.147945205	0	7.888931
TCGA-CW-6087	0.112328767	1	8.737961
TCGA-BP-4166	0.035616438	0	9.6188
TCGA-MW-A4EC	1.364383562	0	4.94243
TCGA-CJ-6033	0.61369863	1	10.79504
TCGA-CZ-4860	0.564383562	1	8.542098
TCGA-CJ-5683	5.175342466	0	9.872188
TCGA-B0-5705	12.43013699	0	15.51694
TCGA-BP-4973	3.791780822	0	19.66711
TCGA-B0-5088	1.542465753	1	7.498622
TCGA-BP-5000	1.542465753	0	4.708723
TCGA-A3-3363	0.873972603	0	6.248601
TCGA-BP-4345	4.153424658	0	7.61753
TCGA-BP-5184	3.104109589	0	15.56236
TCGA-A3-A8OW	0.884931507	0	25.48295
TCGA-BP-4338	7.832876712	0	4.72024
TCGA-BP-4163	7.778082192	0	10.81535
TCGA-A3-3374	3.6	0	8.752373
TCGA-B0-5109	1.608219178	1	6.01307
TCGA-EU-5905	0.326027397	0	16.88222
TCGA-A3-3362	4.271232877	0	12.07577
TCGA-B4-5836	0.38630137	0	19.81149
TCGA-B8-4154	3.780821918	0	6.765347
TCGA-BP-4992	1.37260274	0	4.627371
TCGA-AS-3777	3.391780822	0	2.064891
TCGA-B0-4697	1.583561644	1	7.351147
TCGA-B0-5694	1.315068493	1	10.23557
TCGA-B0-4821	3.369863014	1	9.327038
TCGA-B0-5703	6.153424658	0	11.72462
TCGA-CZ-5988	1.898630137	0	14.80058
TCGA-BP-4351	2.657534247	0	26.47879
TCGA-BP-5180	6.2	0	6.309463
TCGA-CJ-4878	5.989041096	0	12.92807
TCGA-BP-5189	2.252054795	1	18.21306
TCGA-A3-3365	2.391780822	0	8.831945
TCGA-CZ-4853	2.120547945	0	13.00406
TCGA-CJ-4873	6.189041096	0	6.251484
TCGA-BP-4342	6.180821918	1	17.99293
TCGA-AK-3456	3.131506849	0	11.20962
TCGA-B0-4706	0.178082192	1	8.220207
TCGA-B0-4700	5.424657534	1	6.023659
TCGA-B0-5706	8.780821918	0	16.50514
TCGA-CW-6088	8.82739726	0	16.14423
TCGA-BP-4164	2.717808219	1	12.21503
TCGA-A3-3331	4.068493151	0	13.91268
TCGA-CJ-5677	2.142465753	1	8.591014
TCGA-AK-3450	4.873972603	0	16.6124
TCGA-CZ-5987	1.219178082	1	7.84519
TCGA-B8-A54I	0.410958904	0	5.478296
TCGA-CZ-5452	4.901369863	0	6.602829
TCGA-B0-5092	1.257534247	1	7.485918
TCGA-B0-4811	3.882191781	1	6.257475
TCGA-CZ-5982	6.682191781	0	8.304987
TCGA-A3-3373	4.44109589	0	13.67157
TCGA-CJ-6032	9.969863014	0	5.472049
TCGA-B0-4817	2.791780822	1	8.787325
TCGA-CZ-5457	7.545205479	0	11.77261
TCGA-AK-3427	9.816438356	0	1.444071
TCGA-BP-4177	4.575342466	0	15.35226
TCGA-CZ-5463	1.81369863	0	13.63962
TCGA-B8-A54K	1.284931507	0	14.76124
TCGA-B0-5099	1.328767123	1	10.86386
TCGA-BP-5199	3.712328767	0	8.75231
TCGA-A3-3326	3.115068493	0	19.67943
TCGA-CW-5583	6.819178082	0	20.80206
TCGA-B0-4696	2.37260274	1	4.501143
TCGA-B8-4153	2.087671233	0	9.161259
TCGA-B0-5698	9.947945205	0	10.55212
TCGA-CJ-4871	6.638356164	0	9.472149
TCGA-CJ-4875	9.736986301	1	6.200457
TCGA-CZ-5453	6.62739726	1	9.837184
TCGA-BP-4337	0.005479452	1	9.071214
TCGA-B0-4823	1.243835616	1	8.909733
TCGA-A3-3380	1.553424658	0	27.90318
TCGA-B0-5695	5.890410959	0	13.00429
TCGA-MM-A84U	1.917808219	0	6.026879
TCGA-B4-5835	0.043835616	0	4.951685
TCGA-B0-5094	0.912328767	1	12.15612
TCGA-AK-3426	2.424657534	1	5.39916
TCGA-CZ-4856	0.049315068	0	10.6857
TCGA-B0-5106	4.378082192	1	12.47959
TCGA-BP-4761	0.498630137	0	3.964946
TCGA-B0-5116	3.490410959	0	11.90614
TCGA-B2-4098	0.139726027	1	7.283905
TCGA-B8-4148	4.164383562	0	8.948891
TCGA-B0-4843	0.876712329	1	5.301522
TCGA-B8-5164	0.071232877	0	13.0557
TCGA-CW-5581	7.668493151	0	13.45315
TCGA-G6-A8L7	5.843835616	0	2.371167
TCGA-BP-5202	0.079452055	0	18.109
TCGA-CJ-5679	1.860273973	1	4.048481
TCGA-BP-4963	5.024657534	0	6.538478
TCGA-CZ-5466	1.876712329	0	8.069041
TCGA-AK-3440	7.849315068	0	6.070741
TCGA-B8-5552	2.865753425	0	9.294475
TCGA-BP-4167	7.446575342	0	5.783293
TCGA-B8-A54H	0.701369863	0	9.039011
TCGA-BP-5186	1.898630137	0	14.91575
TCGA-BP-4346	4.090410959	1	12.08186
TCGA-CJ-4895	3.287671233	1	8.189545
TCGA-DV-5574	5.523287671	0	12.52711
TCGA-CZ-5465	7.024657534	1	8.613441
TCGA-A3-3306	3.068493151	0	8.891085
TCGA-B0-5696	7.147945205	0	8.040021
TCGA-B8-5162	0.098630137	0	10.16797
TCGA-BP-4959	7.287671233	0	5.507991
TCGA-BP-4986	2.150684932	0	8.249064
TCGA-BP-4159	7.126027397	1	8.20944
TCGA-B0-4701	0.652054795	1	10.93379
TCGA-AK-3434	5.717808219	0	16.69713
TCGA-B8-A54E	2.490410959	0	5.529415
TCGA-BP-4960	5.950684932	0	4.872867
TCGA-EU-5904	1.509589041	0	23.5626
TCGA-B0-4824	4.539726027	1	5.798683
TCGA-A3-3358	3.580821918	0	6.841941
TCGA-B8-5165	2.019178082	0	18.30115
TCGA-B0-5700	4.904109589	0	6.346461
TCGA-CZ-5459	4.610958904	0	11.81061
TCGA-B0-5121	4.068493151	0	9.453106
TCGA-B8-5553	1.191780822	0	30.1836
TCGA-B0-5096	0.18630137	1	9.237164
TCGA-A3-3319	3.095890411	0	4.879899
TCGA-BP-4769	5.139726027	0	14.02639
TCGA-DV-5573	3.095890411	0	6.96892
TCGA-BP-4161	7.523287671	0	13.46862
TCGA-BP-4994	3.583561644	0	9.512555
TCGA-BP-4355	2.610958904	1	11.66325
TCGA-B0-5113	3.219178082	0	15.23375
TCGA-BP-4340	1.539726027	1	18.43933
TCGA-CW-6097	1.564383562	1	14.81775
TCGA-BP-4777	4.742465753	0	4.617842
TCGA-B0-4688	0.276712329	1	6.709922
TCGA-A3-3329	4.449315068	0	7.626388
TCGA-BP-4790	3.043835616	1	12.87144
TCGA-CZ-4863	5.282191781	0	7.820827
TCGA-BP-4962	4.890410959	0	6.895115
TCGA-CW-5589	6.515068493	0	13.13769
TCGA-CZ-4858	5.767123288	1	4.918952
TCGA-CZ-5461	0.904109589	1	9.909514
TCGA-B4-5378	0.479452055	0	23.34785
TCGA-A3-A6NN	0.008219178	0	18.59556
TCGA-BP-4343	5.238356164	1	7.286737
TCGA-B0-5691	9.4	0	22.96551
TCGA-CJ-4635	3.879452055	0	9.050866
TCGA-A3-A8OU	0	0	7.772709
TCGA-BP-4352	0.942465753	1	6.048399
TCGA-B0-4713	0.553424658	1	6.349818
TCGA-CJ-6031	5.221917808	0	9.522633
TCGA-CJ-4890	9.64109589	0	12.02952
TCGA-BP-5010	2.405479452	1	6.450099
TCGA-A3-3322	4.049315068	0	10.65429
TCGA-A3-3370	6.230136986	0	16.82362
TCGA-B0-4828	0.84109589	1	11.5142
TCGA-AK-3443	3.898630137	0	9.315995
TCGA-B0-4849	0.189041096	1	8.614598
TCGA-BP-4985	2.608219178	1	9.110152
TCGA-CJ-4885	9.454794521	0	16.40276
TCGA-CZ-5989	5.219178082	0	16.99137
TCGA-CZ-5456	6.635616438	0	6.401445
TCGA-CJ-4884	4.819178082	0	7.531741
TCGA-B0-4813	0.049315068	1	6.263992
TCGA-BP-4803	0.55890411	0	18.03972
TCGA-B4-5843	0.030136986	0	17.44296
TCGA-BP-4977	1.243835616	0	11.51657
TCGA-CJ-4892	4.167123288	0	9.02564
TCGA-B0-4844	0.857534247	1	5.848264
TCGA-BP-5178	5.238356164	1	8.7812
TCGA-AK-3425	9.15890411	0	5.972167
TCGA-CW-5587	6.098630137	0	13.21105
TCGA-A3-3343	2.589041096	0	20.88224
TCGA-A3-A8CQ	0.008219178	0	6.331119
TCGA-BP-4799	3.104109589	1	5.614394
TCGA-B0-4838	2.284931507	1	8.664622
TCGA-A3-A8OV	0.931506849	0	8.115008
TCGA-CZ-4865	0.454794521	1	8.492038
TCGA-BP-4326	4.452054795	1	17.64431
TCGA-BP-4771	0.443835616	1	6.904658
TCGA-B0-4945	5.876712329	1	10.246
TCGA-BP-4782	0.969863014	0	10.57046
TCGA-B0-5702	5.950684932	0	3.242007
TCGA-B8-5550	4.043835616	0	11.94734
TCGA-B8-A54J	1.446575342	0	10.67736
TCGA-CZ-5454	1.978082192	1	10.3733
TCGA-BP-4344	4.564383562	0	9.206742
TCGA-BP-4991	3.871232877	0	15.17459
TCGA-CJ-4634	9.583561644	0	10.5505
TCGA-CZ-4861	1.221917808	1	12.00352
TCGA-BP-4961	5.301369863	0	28.43253
TCGA-BP-4176	5.356164384	0	7.022192
TCGA-BP-5174	6.183561644	0	8.230981
TCGA-EU-5907	0.347945205	0	5.402032
TCGA-B8-5158	3.336986301	0	10.0246
TCGA-BP-4758	6.049315068	0	7.82557
TCGA-A3-A8OX	0	0	9.206377
TCGA-AK-3461	6.073972603	0	16.00926
TCGA-CW-5584	0.449315068	1	7.668282
TCGA-CJ-4902	4.164383562	0	12.23489
TCGA-AK-3458	3.2	0	14.12197
TCGA-BP-4335	1.301369863	1	8.36978
TCGA-B0-4814	0.460273973	1	16.96808
TCGA-B0-5119	4.252054795	0	13.82008
TCGA-MM-A563	1.619178082	0	7.629953
TCGA-BP-4775	5.049315068	0	10.11135
TCGA-BP-4965	5.126027397	0	13.11724
TCGA-CJ-4891	2.243835616	1	6.968858
TCGA-CJ-4868	1.769863014	1	10.05534
TCGA-CJ-4899	4.18630137	0	18.1959
TCGA-B0-4822	3.043835616	1	3.659455
TCGA-AK-3445	6.553424658	0	9.008362
TCGA-B0-4819	0.501369863	1	6.972963
TCGA-B0-4815	4.350684932	1	8.284337
TCGA-B2-3923	2.717808219	0	14.9994
TCGA-EU-5906	0.564383562	0	16.93557
TCGA-CJ-4920	0.380821918	1	9.423815
TCGA-B8-4619	1.432876712	0	8.69862
TCGA-A3-3324	3.249315068	0	8.865165
TCGA-CJ-4903	4.271232877	0	11.9257
TCGA-MM-A564	1.663013699	0	7.857102
TCGA-BP-5190	2.769863014	0	11.23259
TCGA-CJ-6028	4.452054795	1	9.561657
TCGA-CJ-4918	0.254794521	1	12.59931
TCGA-BP-5168	4.008219178	1	15.7272
TCGA-BP-4967	0.561643836	0	9.964851
TCGA-B2-4101	1.775342466	0	11.98675
TCGA-B4-5838	0.454794521	0	11.00512
TCGA-B4-5377	1	0	7.552821
TCGA-B0-4848	2.419178082	1	6.738472
TCGA-B0-5083	2.863013699	1	6.647079
TCGA-CJ-4881	5.517808219	0	6.113843
TCGA-CW-5585	7.147945205	0	13.07725
TCGA-BP-4331	6.723287671	1	6.449822
TCGA-G6-A8L6	0.857534247	1	7.688578
TCGA-BP-4975	3.926027397	0	13.97837
TCGA-B8-5546	1.383561644	0	11.91323
TCGA-B0-5097	1.821917808	0	9.753834
TCGA-BP-5169	0.528767123	0	5.039162
TCGA-CJ-4640	9.534246575	0	7.496902
TCGA-B0-4852	3.071232877	1	9.837138
TCGA-BP-5181	4.095890411	0	19.95691
TCGA-BP-4762	3.679452055	1	9.838961
TCGA-B0-5697	7.205479452	0	8.331732
TCGA-B0-5699	10.52328767	0	19.16674
TCGA-AK-3447	3.334246575	0	1.734232
TCGA-B0-5399	3.865753425	0	11.56595
TCGA-B0-5120	3.202739726	0	16.41764
TCGA-DV-A4W0	6.767123288	0	12.396
TCGA-CJ-4912	4.539726027	0	7.981214
TCGA-BP-4334	1.767123288	1	3.990338
TCGA-BP-4995	3.756164384	0	10.84589
TCGA-B0-4810	1.309589041	1	5.151166
TCGA-B2-5635	2.068493151	0	10.27252
TCGA-BP-5009	2.991780822	1	5.899792
TCGA-B8-A54D	2.273972603	0	10.33103
TCGA-BP-4982	2.778082192	0	18.45286
TCGA-B0-4836	3.391780822	1	12.01421
TCGA-CJ-4644	0.920547945	1	9.064341
TCGA-B0-5690	9.293150685	0	8.506829
TCGA-CJ-5678	1.57260274	1	8.340818
TCGA-BP-5196	2.789041096	0	9.494148
TCGA-CJ-5671	10.92328767	0	8.136427
TCGA-B0-4694	0.290410959	1	10.10509
TCGA-CJ-5675	10.78356164	0	6.592046
TCGA-BP-4789	4.079452055	0	12.96604
TCGA-CJ-4904	9.046575342	0	15.45947
TCGA-CZ-5464	5.830136986	0	7.912802
TCGA-B0-5081	0.991780822	1	5.287577
TCGA-BP-5200	2.912328767	0	9.832735
TCGA-DV-5567	5.490410959	0	17.61787
TCGA-B2-5639	2.747945205	1	8.553759
TCGA-B0-5117	4.405479452	0	3.218636
TCGA-BP-4969	4.915068493	0	5.147716
TCGA-CZ-5985	5.471232877	0	10.38654
TCGA-B8-A54F	1.421917808	0	27.65103
TCGA-AK-3453	6.934246575	0	5.097764
TCGA-BP-4989	0.323287671	0	4.868404
TCGA-A3-3387	1.690410959	0	11.46751
TCGA-DV-5566	3.830136986	0	8.47174
TCGA-CJ-4897	9.153424658	0	14.24982
TCGA-A3-3372	2.01369863	0	13.82257
TCGA-BP-4341	4.353424658	1	14.88229
TCGA-B0-5693	11.16164384	0	15.87064
TCGA-A3-3351	2.493150685	0	18.18825
TCGA-B8-A54G	0.145205479	0	8.774159
TCGA-A3-3349	3.794520548	0	13.95164
TCGA-BP-5194	1.117808219	0	15.15518
TCGA-B0-4703	0.498630137	1	9.496023
TCGA-B8-5163	2.252054795	0	7.927137
TCGA-BP-4807	0.578082192	0	10.74231
TCGA-A3-3320	4.131506849	0	12.62582
TCGA-BP-4776	1.126027397	0	8.895411
TCGA-A3-3378	1.726027397	0	12.69476
TCGA-BP-4971	4.073972603	0	5.857813
TCGA-BP-4972	4.115068493	0	10.75266
TCGA-CZ-5458	7.64109589	0	20.04734
TCGA-CJ-4905	4.098630137	0	14.70962
TCGA-BP-4353	1.02739726	1	19.62475
TCGA-BP-4970	1.18630137	0	14.23187
TCGA-B0-4847	2.17260274	1	4.976959
TCGA-BP-5007	3.123287671	0	17.57641
TCGA-B0-4846	3.287671233	1	9.80786
TCGA-B2-4099	2.663013699	0	3.861287
TCGA-BP-4797	3.032876712	0	9.698138
TCGA-B0-4827	2.424657534	1	12.81344
TCGA-BP-4964	5.101369863	0	11.30994
TCGA-AK-3460	6.871232877	0	23.15894
TCGA-CZ-4854	3.846575342	1	6.907728
TCGA-CJ-4872	0.893150685	0	9.714526
TCGA-CJ-5689	4.438356164	1	7.61448
TCGA-BP-4770	0.901369863	1	10.74466
TCGA-CZ-5467	0.2	1	14.98928
TCGA-AK-3454	2.394520548	0	3.800597
TCGA-B0-5107	2.539726027	1	11.21091
TCGA-BP-4760	6.468493151	0	11.76045
TCGA-BP-4173	5.18630137	0	9.517196
TCGA-B4-5832	0.424657534	0	14.63429
TCGA-CJ-4886	5.347945205	0	11.60152
TCGA-BP-4160	7.893150685	0	7.890623
TCGA-BP-5192	1.956164384	0	11.76887
TCGA-CJ-4908	4.194520548	0	13.56941
TCGA-B2-5641	1.797260274	0	7.478096
TCGA-CJ-4888	4.293150685	1	16.80108
TCGA-BP-4798	0.915068493	1	17.58667
TCGA-CJ-4876	5.356164384	0	8.105375
TCGA-BP-5198	1.652054795	0	19.33029
TCGA-CJ-4639	8.846575342	0	13.3678
TCGA-B0-5077	3.608219178	1	9.65341
TCGA-B0-5701	6.742465753	0	19.58478
TCGA-CZ-4862	8.961643836	0	10.68557
TCGA-BP-5175	2.553424658	0	2.623686
TCGA-BP-4976	4.471232877	0	15.39062
TCGA-A3-A6NL	1.887671233	0	8.868746
TCGA-B0-4816	3.756164384	1	14.89032
TCGA-CJ-6030	6.298630137	1	13.73101
TCGA-CZ-5470	1.057534247	0	10.87085
TCGA-BP-5001	3.224657534	0	5.325768
TCGA-CJ-4870	4.104109589	0	11.83416
TCGA-A3-3357	7.364383562	0	9.272925
TCGA-BP-4784	5.079452055	0	13.17128
TCGA-A3-3385	5.460273973	0	17.0973
TCGA-A3-3367	6.219178082	0	14.834
TCGA-BP-4162	8.421917808	0	9.439588
TCGA-BP-4170	6.419178082	1	9.124931
TCGA-CJ-4636	5.271232877	0	5.973549
TCGA-BP-5183	3.536986301	0	8.689306
TCGA-B0-4718	4.871232877	0	9.902922
TCGA-G6-A8L8	2.989041096	1	5.168133
TCGA-AK-3433	9.339726027	0	5.526094
TCGA-B0-4837	3.775342466	1	8.2464
TCGA-B0-4818	1.397260274	1	15.20809
TCGA-A3-A6NI	2.789041096	0	9.74051
TCGA-CW-5580	5.380821918	1	22.85155
TCGA-BP-4354	2.832876712	1	14.88899
TCGA-B8-A7U6	1.356164384	0	14.00804
TCGA-BP-5191	2.649315068	0	4.911757
TCGA-B8-4620	2.128767123	0	10.89372
TCGA-B0-5102	7.57260274	1	4.216488
TCGA-BP-4165	8.320547945	0	7.969757
TCGA-DV-5565	3.64109589	0	5.570752
TCGA-BP-4765	5.983561644	0	15.11396
TCGA-BP-4759	6.498630137	0	9.220758
TCGA-A3-3352	1.536986301	1	11.75238
TCGA-BP-4968	4.783561644	0	9.129564
TCGA-B2-A4SR	1.389041096	0	14.34006
TCGA-DV-5568	1.01369863	0	9.114178
TCGA-CJ-4874	6.254794521	0	9.721703
TCGA-CJ-4643	4.912328767	0	12.1901
TCGA-B0-4691	0.380821918	1	4.650958
TCGA-CJ-5682	10.23561644	0	12.7978
TCGA-B0-4839	4.490410959	1	6.745447
TCGA-BP-4983	3.871232877	0	6.187423
TCGA-BP-4787	1.315068493	1	6.797175
TCGA-CW-6093	8.619178082	0	13.20485
TCGA-AK-3428	10.21369863	0	17.84721
TCGA-BP-5201	2.605479452	0	7.564902
TCGA-A3-3382	1.57260274	0	9.224576
TCGA-B0-4833	6.536986301	1	7.945132
TCGA-CJ-4637	6.101369863	1	10.34213
TCGA-BP-4327	0.298630137	1	5.599213
TCGA-CZ-4857	3.923287671	1	12.24023
TCGA-BP-4781	5.698630137	0	7.681355
TCGA-BP-5173	0.169863014	1	7.078021
TCGA-BP-5006	2.301369863	0	8.35963
TCGA-DV-5569	0.97260274	0	9.694596
TCGA-BP-5176	4.356164384	1	10.13353
TCGA-B0-4845	5.44109589	1	8.701721
TCGA-BP-4974	0.578082192	1	8.203424
TCGA-BP-4330	5.17260274	0	17.23465
TCGA-CJ-6027	9.904109589	1	5.935736
TCGA-B0-5709	10.88767123	0	16.17641
TCGA-B0-5075	1.745205479	1	7.128112
TCGA-B8-5549	0.531506849	0	19.48633
TCGA-CJ-5676	11.14246575	0	10.64911
TCGA-B0-5104	7.539726027	1	9.509035
TCGA-CJ-4894	2.304109589	1	12.72476
TCGA-B0-4712	3.663013699	1	3.446981
TCGA-CW-5590	2.945205479	1	9.024535
TCGA-B0-5713	7.621917808	0	11.70762
TCGA-B0-5110	5.504109589	0	10.80661
TCGA-CZ-5462	0.852054795	1	8.729015
TCGA-DV-5576	1.991780822	1	16.89046
TCGA-BP-5185	3.101369863	0	2.70997
TCGA-B0-5400	4.747945205	0	4.638419
TCGA-CJ-4889	5.331506849	0	10.40809
TCGA-CJ-4900	4.695890411	1	13.84232
TCGA-BP-4795	1.698630137	0	10.87358
TCGA-3Z-A93Z	1.054794521	0	7.380349
TCGA-DV-A4VZ	1	0	4.333005
TCGA-BP-4756	1.024657534	0	10.62814
TCGA-BP-4981	3.005479452	1	7.178958
TCGA-A3-3328	3.794520548	0	10.00605
TCGA-AK-3431	6.139726027	1	13.41629
TCGA-CZ-4864	7.753424658	1	16.23481
TCGA-CJ-4901	3.97260274	0	8.813458
TCGA-CZ-5469	2.591780822	1	13.15141
TCGA-CJ-5684	6.112328767	0	9.745328
TCGA-B8-4151	3.55890411	0	12.86039
TCGA-B2-5636	2.517808219	0	16.96191
TCGA-A3-3347	4.410958904	1	7.990966
TCGA-A3-3311	3.263013699	1	11.91098
TCGA-B0-5080	0.936986301	1	9.31918
TCGA-B0-5402	3.534246575	0	36.18297
TCGA-B0-5712	7.457534247	0	12.00173
TCGA-CZ-5468	0.161643836	1	5.902245
TCGA-BP-4987	3.079452055	0	9.313972
TCGA-BP-4763	3.479452055	1	10.36699
TCGA-B8-4143	1.942465753	1	8.700458
TCGA-BP-4347	3.745205479	0	9.961537
TCGA-B0-5710	6.657534247	0	9.433187
TCGA-CW-5591	6.221917808	0	13.35423
TCGA-B2-4102	2.608219178	0	13.8757
TCGA-B4-5844	0.019178082	0	12.82698
TCGA-B0-5095	0.671232877	1	10.69693
TCGA-B0-5108	4.882191781	0	8.850007
TCGA-B0-4834	5.726027397	1	7.389739
TCGA-6D-AA2E	0.991780822	0	12.1999
TCGA-B0-4699	0.301369863	1	8.502222
TCGA-A3-3316	4.090410959	0	9.525188
TCGA-CJ-5680	2.104109589	1	9.90869
TCGA-B8-5545	4.178082192	0	10.90088
TCGA-CJ-4641	4.550684932	1	9.316208
TCGA-B0-5711	10.92876712	0	13.94032
TCGA-BP-5170	6.608219178	0	12.13674
TCGA-A3-3323	3.030136986	0	20.2217
TCGA-A3-3346	0.375342466	1	4.770103
TCGA-BP-5008	2.934246575	0	11.98075
TCGA-A3-3325	3.205479452	1	6.134979
TCGA-BP-4158	9.252054795	0	16.1197
TCGA-BP-4332	3.104109589	0	10.70024
TCGA-CJ-5681	1.512328767	1	12.02532
TCGA-AK-3429	9.117808219	0	5.323518
TCGA-BP-4804	3.997260274	0	7.390988
TCGA-DV-5575	4.736986301	0	10.46617
TCGA-B0-4842	4.723287671	1	5.199694
TCGA-B8-4146	1.4	0	17.712
TCGA-CZ-5984	5.663013699	0	6.72152
TCGA-BP-4801	3.079452055	0	10.65554
TCGA-B0-5692	10.80547945	0	9.083805
TCGA-CZ-5460	7.871232877	0	5.675591
TCGA-B0-4841	0.55890411	1	5.628653
TCGA-A3-3317	4.084931507	0	8.61885
TCGA-B8-A8YJ	1.180821918	0	22.24311
TCGA-BP-4169	1.920547945	1	15.48144
TCGA-BP-5195	2.052054795	0	14.37157
TCGA-BP-4325	8.120547945	0	8.886232
TCGA-AK-3465	1.010958904	0	8.581115
TCGA-CJ-4642	8.780821918	0	8.929778
TCGA-AK-3451	7.857534247	0	3.446528
TCGA-A3-3308	0.043835616	0	12.8683
TCGA-A3-3335	5.167123288	0	10.11196
TCGA-B8-4621	2.15890411	0	10.29936
TCGA-B0-5812	10.50410959	0	12.00151
TCGA-CJ-4916	3.761643836	0	9.451679
TCGA-BP-4768	1.095890411	0	16.48239
TCGA-B0-4698	0.115068493	1	4.158796
TCGA-AK-3455	1.871232877	1	8.822888
TCGA-A3-3359	6.860273973	0	12.4451
TCGA-B0-5098	4.339726027	1	10.94679
TCGA-CJ-4869	6.997260274	0	9.834607
TCGA-B8-5551	0.043835616	0	9.260278
TCGA-B0-5115	4.394520548	0	14.81883
TCGA-CJ-5686	5.583561644	0	13.03004
TCGA-BP-4993	0.484931507	0	14.38692
TCGA-G6-A5PC	0.663013699	1	7.313458
TCGA-B0-4707	1.643835616	1	9.67649
TCGA-A3-3313	2.01369863	1	7.128551
TCGA-B0-4710	4.808219178	0	11.44336
TCGA-B2-5633	2.638356164	0	13.08439
TCGA-CW-5588	5.526027397	0	7.337001
TCGA-B0-5707	10.25753425	0	8.7809
TCGA-CJ-4882	5.15890411	0	9.764676
TCGA-CJ-4907	4.106849315	0	14.52785
TCGA-B0-5100	5.24109589	1	11.26969
TCGA-A3-3376	4.646575342	1	13.01829
TCGA-B4-5834	0.071232877	0	25.38821
TCGA-AS-3778	0.117808219	0	17.77084
TCGA-BP-4999	3.468493151	0	18.28042
TCGA-A3-A6NJ	1.282191781	0	9.23627
TCGA-CJ-5672	6	1	6.92481
TCGA-CJ-4887	2.553424658	1	5.123821
TCGA-B2-3924	2.991780822	0	16.36289
TCGA-BP-5182	3.191780822	0	9.228007
TCGA-CZ-5451	5.284931507	0	22.17492
TCGA-CZ-5986	1.021917808	0	18.69847
TCGA-B0-4714	0.271232877	1	7.610521
TCGA-BP-5004	3.084931507	0	41.32853
TCGA-B0-5085	2.109589041	1	6.135372
TCGA-CZ-4859	4.895890411	0	6.945928
TCGA-B8-5159	1.978082192	0	22.39137
TCGA-BP-4329	2.315068493	1	11.86491
TCGA-B0-4690	0.117808219	1	6.993691
TCGA-A3-3383	2.35890411	0	5.938907
TCGA-CW-6090	6.991780822	0	11.03367
TCGA-B8-4622	4.178082192	0	12.71745
TCGA-CZ-4866	8.950684932	0	6.688223
TCGA-BP-4766	4.005479452	0	13.02362
TCGA-AK-3436	9.126027397	0	11.16569
TCGA-BP-5187	1.112328767	0	22.28651
TCGA-BP-4774	5.164383562	0	8.906989
TCGA-A3-3307	3.934246575	0	14.17962
TCGA-BP-4998	2.553424658	0	12.29435
TCGA-CZ-5455	1.536986301	1	17.60186
TCGA-CJ-4638	1.180821918	1	6.144154
TCGA-B0-5084	0.608219178	1	4.900065
